# Supplementary material for: Retrospective cohort study of cancer incidence and mortality by HIV status in a Georgia, USA, prisoner cohort during the HAART era
Source: PubMed Central journal article supplement — BMJ Open. 2016 Apr 11;6(4):e009778. doi: 10.1136/bmjopen-2015-009778 (PMC4838674; doi:10.1136/bmjopen-2015-009778), 2016-04-11
Supplement: bmjopen-2015-009778supp_tables.pdf [file bmjopen-2015-009778supp_tables.pdf]

Table I. Distribution of cancer stage at diagnosis by HIV status.

| Stage at diagnosis | HIV-positive (%) |      | HIV-negative (%) |      | <i>p</i> -value <sup>a</sup> |
|--------------------|------------------|------|------------------|------|------------------------------|
|                    | N                | %    | N                | %    |                              |
| In situ            | 0                | 0    | 1                | 0.1  | 0.60                         |
| Localized          | 15               | 30.6 | 286              | 35.8 |                              |
| Regional           | 8                | 16.3 | 181              | 22.7 |                              |
| Distant            | 20               | 40.8 | 257              | 32.3 |                              |
| Unknown            | 6                | 12.2 | 73               | 9.1  |                              |

Abbreviations: ADC – AIDS-Defining Cancer; NADC – Non-AIDS-Defining Cancer.

Table II. Distribution of cancer at diagnosis by cancer type, among HIV-positive.

| Stage at diagnosis | ADC |      | Viral-associated NADC |      | Non-viral-associated NADC |      | <i>p</i> -value |
|--------------------|-----|------|-----------------------|------|---------------------------|------|-----------------|
|                    | N   | %    | N                     | %    | N                         | %    |                 |
| In situ            | 0   | 0    | 0                     | 0    | 0                         | 0    | 0.32            |
| Localized          | 7   | 43.8 | 1                     | 10.0 | 7                         | 30.4 |                 |
| Regional           | 1   | 6.3  | 4                     | 40.0 | 3                         | 13.0 |                 |
| Distant            | 6   | 37.5 | 4                     | 40.0 | 10                        | 43.5 |                 |
| Unknown            | 2   | 12.5 | 1                     | 10.0 | 3                         | 13.0 |                 |

Abbreviations: ADC – AIDS-Defining Cancer; NADC – Non-AIDS-Defining Cancer.

Table III. Distribution of cancer at diagnosis by cancer type, among HIV-negative.

| Stage at diagnosis | ADC |      | Viral-associated NADC |      | Non-viral-associated NADC |      | <i>p</i> -value |
|--------------------|-----|------|-----------------------|------|---------------------------|------|-----------------|
|                    | N   | %    | N                     | %    | N                         | %    |                 |
| In situ            | 0   | 0    | 0                     | 0    | 1                         | 0.1  | <0.0001         |
| Localized          | 4   | 13.8 | 8                     | 14.8 | 274                       | 38.3 |                 |
| Regional           | 3   | 10.3 | 26                    | 48.1 | 152                       | 21.3 |                 |
| Distant            | 17  | 58.6 | 13                    | 24.1 | 227                       | 31.7 |                 |
| Unknown            | 5   | 17.2 | 7                     | 13.0 | 61                        | 8.5  |                 |

Abbreviations: ADC – AIDS-Defining Cancer; NADC – Non-AIDS-Defining Cancer.
